# Supplementary material
Source: publisher figshare collection journal article supplement (https://osapublishing.figshare.com/ndownloader/files/27853587)
Supplement: Supplementary file 1 [file 27853587]

# Light propagation in a three-dimensional Rydberg gas with a nonlocal optical response: supplement

**YAN-LI ZHOU<sup>1,2,\*</sup>**

<sup>1</sup>*Department of Physics, College of Liberal Arts and Sciences, National University of Defense Technology, Changsha 410073, China*

<sup>2</sup>*Interdisciplinary Center for Quantum Information, National University of Defense Technology, Changsha 410073, China*

\*[ylzhou@nudt.edu.cn](mailto:ylzhou@nudt.edu.cn)

---

This supplement published with The Optical Society on 3 May 2021 by The Authors under the terms of the [Creative Commons Attribution 4.0 License](#) in the format provided by the authors and unedited. Further distribution of this work must maintain attribution to the author(s) and the published article's title, journal citation, and DOI.

Supplement DOI: <https://doi.org/10.6084/m9.figshare.14483328>

Parent Article DOI: <https://doi.org/10.1364/OE.425208>

# Light propagation in a three-dimensional Rydberg gas with a nonlocal optical response

## Appendix: Susceptibility in $k$ space

Yan-Li Zhou<sup>1,2</sup>

<sup>1</sup> *Department of Physics, College of Liberal Arts and Sciences,  
National University of Defense Technology, Changsha 410073, China*

<sup>2</sup> *Interdisciplinary Center for Quantum Information,  
National University of Defense Technology, Changsha 410073, China*

To derive the susceptibilities  $\tilde{\chi}_l$  (Eq.(16)) and  $\tilde{\chi}_n$  (Eq. (17)) in  $k$  space, applied the following rules of the Fourier transform (here, we definition:  $\mathcal{F}[f(x)] = \tilde{f}(k) = \frac{1}{\sqrt{2\pi}} \int_{-\infty}^{\infty} f(x) e^{-ikx} dx$ ):

(i) Convolution theorem: For  $f(x) = f_1(x) * f_2(x) = \int_{-\infty}^{\infty} f_1(x') f_2(x - x') dx'$ , where  $*$  denotes the convolution operation, then:

$$\tilde{f}(k) = \sqrt{2\pi} \tilde{f}_1(k) \cdot \tilde{f}_2(k)$$

and

$$\mathcal{F}[f_1 f_2] = \frac{1}{\sqrt{2\pi}} \tilde{f}_1(k) * \tilde{f}_2(k);$$

(ii) Translation/ time-Shifting: For any real number  $x_0$ , we have

$$\mathcal{F}[f(x - x_0)] = e^{-ix_0 k} \tilde{f}(k);$$

(iii) Modulation/ frequency shifting: For any real number  $k_0$ , if  $f'(x) = e^{ixk_0} f(x)$ , then

$$\mathcal{F}[f'(x)] = \tilde{f}(k - k_0);$$

(iv) Time scaling: For a nonzero real number  $a$ ,

$$\mathcal{F}[f(ax)] = \frac{1}{|a|} \tilde{f}\left(\frac{k}{a}\right).$$

We now perform a Fourier transform on the susceptibility. For the local term, we have

$$\begin{aligned} \mathcal{F}[\chi_l(\mathbf{r}) E(\mathbf{r})] &= \mathcal{F}\left[g \int_{-\infty}^{\infty} \alpha_l(\mathbf{r} - \mathbf{r}') n(\mathbf{r}') d\mathbf{r}' E(\mathbf{r})\right] \\ &= \frac{1}{\sqrt{2\pi}} \mathcal{F}\left[g \int_{-\infty}^{\infty} \alpha_l(\mathbf{r} - \mathbf{r}') n(\mathbf{r}') d\mathbf{r}'\right] * \mathcal{F}[E(\mathbf{r})] \\ &= \frac{1}{\sqrt{2\pi}} \left(\mathcal{F}\left[\int_{-\infty}^{\infty} A_0 n(\mathbf{r}') d\mathbf{r}'\right] + \mathcal{F}\left[\int_{-\infty}^{\infty} \alpha^+(\mathbf{r} - \mathbf{r}') n(\mathbf{r}') d\mathbf{r}'\right]\right) * \mathcal{F}[E(\mathbf{r})] \\ &= \left(\frac{1}{\sqrt{2\pi}} \mathcal{F}[A_0] + \mathcal{F}[\alpha^+(\mathbf{r})] \mathcal{F}[n(\mathbf{r})]\right) * \mathcal{F}[E(\mathbf{r})] \\ &= \left(A_0 \delta(\mathbf{k}) + \sqrt{2\pi} n \tilde{\alpha}^+(\mathbf{k}) \delta(\mathbf{k})\right) * \tilde{E}(\mathbf{k}) \\ &= \left(A_0 + \sqrt{2\pi} n \tilde{\alpha}^+(0)\right) \tilde{E}(\mathbf{k}) \\ &= \tilde{\chi}_l \tilde{E}(\mathbf{k}). \end{aligned} \tag{1}$$

Here  $A_0 = 2g\delta/(\Omega_c^2 - 2i\Gamma\delta)$ ,  $\alpha^\pm(\mathbf{r} - \mathbf{r}') = \frac{g\Omega_c^2}{2i\Gamma(2i\Gamma\delta - \Omega_c^2)} (A_+(\mathbf{r} - \mathbf{r}') \pm A_-(\mathbf{r} - \mathbf{r}'))$ ,

$$\begin{aligned} \mathcal{F}[A_\pm(\mathbf{r} - \mathbf{r}')] &= \mathcal{F}\left[\frac{1}{1 + (r/R_b^\pm)^6}\right] \\ &= \frac{1}{(2\pi)^{3/2}} \int \int \int \frac{1}{1 + (r/R_b^\pm)^6} e^{-i(k_x x + k_y y + k_z z)} dx dy dz \end{aligned}$$

$$\begin{aligned}
&= \frac{1}{(2\pi)^{3/2}} \int_0^\infty \int_0^{2\pi} \int_0^\pi \frac{1}{1 + (r/R_b^\pm)^6} e^{-ikr \cos \theta} r^2 \sin \theta d\theta d\varphi dr \\
&= \frac{1}{\sqrt{2\pi}} \int_0^\infty \frac{1}{1 + (r/R_b^\pm)^6} r^2 \int_0^\pi e^{-ikr \cos \theta} \sin \theta d\theta dr \\
&= \frac{1}{\sqrt{2\pi}} \int_0^\infty \frac{1}{1 + (r/R_b^\pm)^6} \frac{r \sin kr}{k} dr \\
&= \frac{\sqrt{2\pi}(R_b^\pm)^3}{6} \frac{e^{-kR_b^\pm} - B e^{-B^* k R_b^\pm} - B^* e^{-B^* k R_b^\pm}}{k R_b^\pm} \\
&= \frac{\sqrt{2\pi}(R_b^\pm)^3}{6} f[kR_b^\pm],
\end{aligned} \tag{2}$$

with  $B = (1 + i\sqrt{3})/2$  and

$$\begin{aligned}
\tilde{\alpha}^\pm(k) &= \mathcal{F}[\alpha_1^\pm(r)] \\
&= \frac{g\Omega_c^2}{2i\Gamma(2i\Gamma\delta - \Omega_c^2)} \mathcal{F}\left[\frac{1}{1 + (r/R_b^\pm)^6}\right] \pm \frac{g\Omega_c^2}{2i\Gamma(2i\Gamma\delta - \Omega_c^2)} \mathcal{F}\left[\frac{1}{1 + (r/R_b^\pm)^6}\right] \\
&= \frac{g\Omega_c^2}{2i\Gamma(2i\Gamma\delta - \Omega_c^2)} \frac{\sqrt{2\pi}}{6} ((R_b^+)^3 f[kR_b^+] \pm (R_b^-)^3 f[kR_b^-]).
\end{aligned} \tag{3}$$

Because

$$\begin{aligned}
\alpha^+(0) &= \frac{g\Omega_c^2}{2i\Gamma(2i\Gamma\delta - \Omega_c^2)} \frac{\sqrt{2\pi}}{6} \lim_{k \rightarrow 0} ((R_b^+)^3 f[kR_b^+] + (R_b^-)^3 f[kR_b^-]) \\
&= \frac{g\Omega_c^2 \sqrt{2\pi}}{12i\Gamma(2i\Gamma\delta - \Omega_c^2)} ((R_b^+)^3 + (R_b^-)^3),
\end{aligned} \tag{4}$$

so

$$\begin{aligned}
\tilde{\chi}_l &= A_0 + \sqrt{2\pi} n \tilde{\alpha}^+(0) \\
&= A_0 + A_1 ((R_b^+)^3 f[kR_b^+] \pm (R_b^-)^3 f[kR_b^-]),
\end{aligned} \tag{5}$$

with  $A_1 = \pi g \Omega_c^2 n / (6i\Gamma(2i\Gamma\delta - \Omega_c^2))$ . Obviously,  $\tilde{\chi}_l$  is  $k$  independent.

For the the nonlocal term:

$$\begin{aligned}
&\mathcal{F}\left[\int \chi_n(\mathbf{r} - \mathbf{r}') E(\mathbf{r}') d\mathbf{r}'\right] \\
&= \mathcal{F}\left[\int_{-\infty}^\infty g\alpha_n(\mathbf{r} - \mathbf{r}') e^{i\mathbf{K} \cdot (\mathbf{r} - \mathbf{r}')} n(\mathbf{r}') E(\mathbf{r}') d\mathbf{r}'\right] \\
&= \mathcal{F}[\alpha^-(\mathbf{r}) e^{i\mathbf{K} \cdot \mathbf{r}} * n(\mathbf{r}) E(\mathbf{r})] \\
&= \sqrt{2\pi} \mathcal{F}[\alpha^-(\mathbf{r}) e^{i\mathbf{K} \cdot \mathbf{r}}] \mathcal{F}[n(\mathbf{r}) E(\mathbf{r})] \\
&= \sqrt{2\pi} n \tilde{\alpha}^-(\mathbf{k} + \mathbf{K}) \tilde{E}(\mathbf{k}) \\
&= \tilde{\chi}_n(\mathbf{k}) \tilde{E}(\mathbf{k})
\end{aligned} \tag{6}$$

with  $\tilde{\chi}_n(\mathbf{k}) = A_1 [(R_b^+)^3 f(|\mathbf{k} + \mathbf{K}|R_b^+) - (R_b^-)^3 f(|\mathbf{k} + \mathbf{K}|R_b^-)]$ , which is  $k$  dependent.
